# Supplementary material for: Eriodictyol Attenuates H2O2-Induced Oxidative Damage in Human Dermal Fibroblasts through Enhanced Capacity of Antioxidant Machinery
Source: MDPI journal article supplement (doi:10.3390/nu14122553), 2022-06-20
Supplement: s1 [file nutrients-1733667-supplementary.pdf › nutrients-1733667-supplementary.pdf]

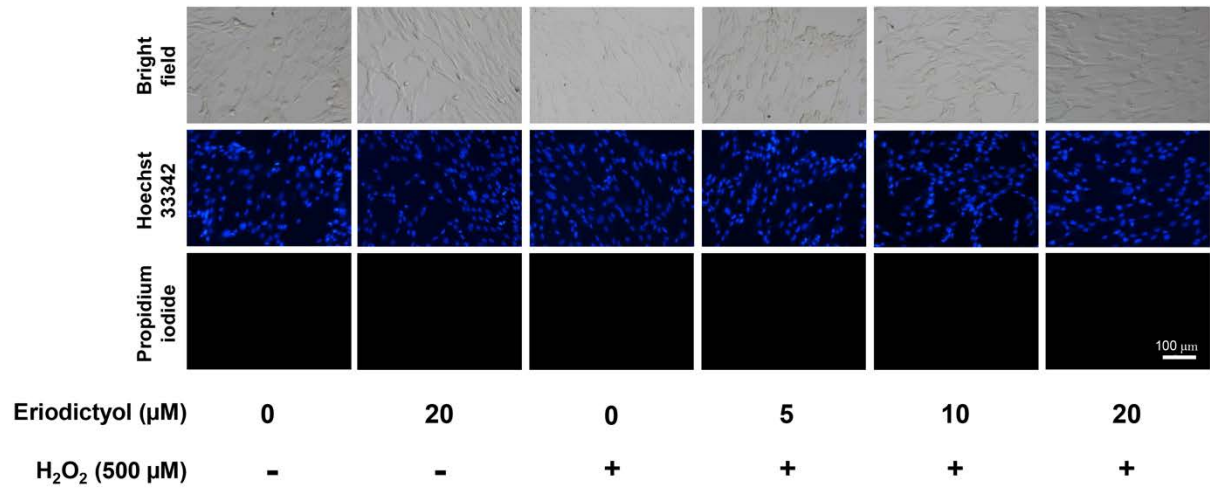

**Figure S1.** Apoptotic and necrotic cells were not immediately observed after H<sub>2</sub>O<sub>2</sub> exposure. BJ cells were incubated with eriodictyol (5 - 20 μM; 24 h), then exposed to H<sub>2</sub>O<sub>2</sub> (500 μM, 1 h). The mode of cell death was instantly investigated after H<sub>2</sub>O<sub>2</sub> challenge using Hoechst 33342/PI double-staining approach ( $n = 3$ ; magnification = 20x; scale bar = 100 μm).

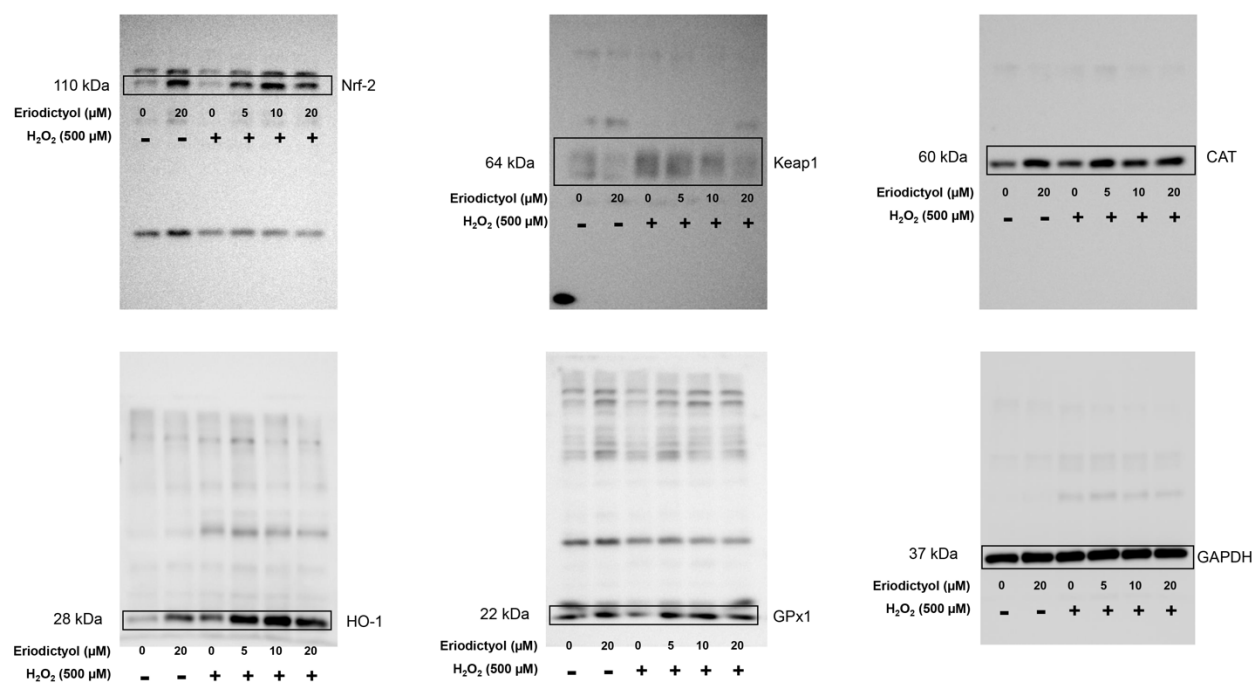

**Figure S2.** Full unedited western blots for Nrf2 (110 kDa), Keap1 (64 kDa), CAT (60 kDa), HO-1 (28 kDa), GPx1 (22 kDa) and GAPDH (37 kDa). These western blot images represent three biological replicates and are used to prepare Figure 7.
